# Supplementary material for: αV-Integrin-Dependent Inhibition of Glioblastoma Cell Migration, Invasion and Vasculogenic Mimicry by the uPAcyclin Decapeptide
Source: Cancers (Basel). 2023 Sep 28;15(19):4775. doi: 10.3390/cancers15194775 (PMC10571957; doi:10.3390/cancers15194775)
Supplement: Supplementary file 1 [file cancers-15-04775-s001.zip]

Archive with 14 entries (14 files):
- Binding assay U87-MG antibodies18_9 copia.xlsx
- Binding assays U87,U251,U138 18_9 copia.xlsx
- Movie S1 U87-MG untreated_Franco et al _ copia.mp4
- Movie S2 U87-MG uPAcyclin_Franco et al _ copia.mp4
- Supplementary Figure S1_Franco et al _ copia.tif
- Supplementary information-Peptide Synthesis.pdf
- Table S1_Franco et al _ copia.tif
- Table S2_Franco et al _ copia.tif
- U138-MG cell invasion 18_9 copia.xlsx
- U138-MG cell migration 18_9 copia.xlsx
- U251-MG cell invasion 18_9 copia.xlsx
- U251-MG cell migration 18_9 copia.xlsx
- U87-MG cell invasion 18_9 copia.xlsx
- U87-MG cell migration18_9 copia.xlsx
