# Supplementary material for: αV-Integrin-Dependent Inhibition of Glioblastoma Cell Migration, Invasion and Vasculogenic Mimicry by the uPAcyclin Decapeptide
Source: Cancers (Basel). 2023 Sep 28;15(19):4775. doi: 10.3390/cancers15194775 (PMC10571957; doi:10.3390/cancers15194775)
Supplement: Supplementary file 1 [file cancers-15-04775-s001.zip › Binding assay U87-MG antibodies18_9 copia.xlsx]

## Sheet: Data
BINDING ASSAYS
U87cells
										AVERAGE DATA
	EXPT-1	EXPT-2	EXPT-3			EXPT-1	EXPT-2	EXPT-3			FITC-uPAcyclin, %	SD
	FITC-uPAcyclin, cpm	FITC-uPAcyclin, cpm	FITC-uPAcyclin, cpm			FITC-uPAcyclin, %	FITC-uPAcyclin, %	FITC-uPAcyclin, %
										None	100	3
None	6974	6532	7362		None	101	104	102		uPAcyclin 1pM	73	3
	7094	5598	7600			99	96	98		uPAcyclin 100 nM	45	6
uPAcyclin 1pM	4948	4216	5508		uPAcyclin 1pM	70	70	74		Scrambled uPAcyclin 1pM	82	5
	4670	4698	5578			70	77	75		Scrambled uPAcyclin 100nM	78	4
uPAcyclin 100 nM	2680	2950	3148		uPAcyclin 100 nM	38	49	42		Vitronectin	45	3
	2928	2670	4064			42	44	54		anti-aV Pclonal	48	6
Scrambled uPAcyclin 1pM	5978	4851			Scrambled uPAcyclin 1pM	85	80			anti-aV MoAb	50	4
	6189	4549				88	75			AB anti-a2	87	7
Scrambled uPAcyclin 100nM	5206	4974			Scrambled uPAcyclin 100nM	74	82			AB anti-actin	83	5
	5627	4549				80	75			MAb anti-GAPDH	86	5
Vitronectin	2955	2758	3524		Vitronectin	42	45	47
	3518	2746	3166			50	45	42
anti-aV Pclonal	2512	3044	3744		anti-aV Pclonal	36	50	50
	3174	2996	4696			45	49	55
anti-aV MoAb	3220	3204	3532		anti-aV MoAb	46	56	47
	3780	2778	3916			53	46	52
AB anti-a2	5928	5932	6220		AB anti-a2	84	98	88
	5448	5614	6508			77	93	87
AB anti-actin	5670	5024	5974		AB anti-actin	81	83	80
	6174	5292	5670			88	87	76
MAb anti-GAPDH	5448	5138	6612		MAb anti-GAPDH	77	85	88
	5988	5246	6849			85	89	92

## Sheet: T-test
T-test
None	101
	99
	104
	96
	102
	98
uPAcyclin 1pM	70	6.41086e-05	***
	70
	70
	77
	74
	75
uPAcyclin 100nM	38	5.44223e-06	***
	42
	49
	44
	42
	54
Scrambled uPAcyclin 1pM	85	0.00808448	*
	88
	80
	75
Scrambled uPAcyclin 100nM	74	0.000966208	*
	80
	82
	75
Vitronectin	42	5.09715e-07	***
	50
	45
	45
	47
	42
anti-aV Pclonal	36	5.58393e-09	***
	45
	50
	49
	50
	55
anti-aV MoAb	46	8.34788e-07	***
	53
	56
	46
	47
	52
AB anti-a2	84	0.00815705	***
	77
	98
	93
	88
	87
AB anti-actin	81	0.000766427	***
	88
	83
	87
	80
	76
MAb anti-GAPDH	77	0.00420995
	85
	85
	89
	88
	92
