# Supplementary material for: αV-Integrin-Dependent Inhibition of Glioblastoma Cell Migration, Invasion and Vasculogenic Mimicry by the uPAcyclin Decapeptide
Source: Cancers (Basel). 2023 Sep 28;15(19):4775. doi: 10.3390/cancers15194775 (PMC10571957; doi:10.3390/cancers15194775)
Supplement: Supplementary file 1 [file cancers-15-04775-s001.zip › Binding assays U87,U251,U138 18_9 copia.xlsx]

## Sheet: Data
BINDING ASSAYS
U87, U251, U138 cell lines
U87-MG
	EXPT-1	EXPT-2	EXPT-3			EXPT-1	EXPT-2	EXPT-3			AVERAGE DATA
	FITC-uPAcyclin, cpm	FITC-uPAcyclin, cpm	FITC-uPAcyclin, cpm			FITC-uPAcyclin, %	FITC-uPAcyclin, %	FITC-uPAcyclin, %				FITC-uPAcyclin, %	SD
uPAcyclin					uPAcyclin						uPAcyclin
None	6716	7688	5593		None	100 +/-2	100 +/-2	100 +/-2
	6554	7464	5229								None	100	2
1fM	5506	6170	4554		1fM	83	81	82			1fM	82	2
	5284	6446	4582			80	85	82			1pM	71	2
1pM	4660	5386	3982		1pM	70	71	72			1nM	63	2
	4802	5422	3794			72	72	68			1µM	50	3
1nM	3988	5006	3380		1nM	60	66	61
	4066	4894	3490			61	64	63
1µM	3286	3828	2837		1µM	50	51	51
	3334	3336	2945			50	44	53
U251-MG
	EXPT-1	EXPT-2	EXPT-3			EXPT-1	EXPT-2	EXPT-3			AVERAGE DATA
	FITC-uPAcyclin, cpm	FITC-uPAcyclin, cpm	FITC-uPAcyclin, cpm			FITC-uPAcyclin, %	FITC-uPAcyclin, %	FITC-uPAcyclin, %				FITC-uPAcyclin, %	SD
uPAcyclin					uPAcyclin						uPAcyclin
None	7406	7655	8080		None	100 +/-4	100 +/-4	100 +/-2			None	100	3
	7061	7261	7804								1fM	73	3
1fM	5423	5496	5896		1fM	75	74	74			1pM	64	3
	5347	5334	5390			74	72	68			1nM	49	3
1pM	4867	4959	4994		1pM	67	66	63			1µM	47	4
	4589	3299	4926			63	61	62
1nM	3540	3826	3982		1nM	49	51	50
	3582	3726	3388			50	50	43
1µM	3660	3337	3784		1µM	51	45	48
	3506	2955	3926			48	40	49
U138-MG
	EXPT-1	EXPT-2	EXPT-3			EXPT-1	EXPT-2	EXPT-3			AVERAGE DATA
	FITC-uPAcyclin, cpm	FITC-uPAcyclin, cpm	FITC-uPAcyclin, cpm			FITC-uPAcyclin, %	FITC-uPAcyclin, %	FITC-uPAcyclin, %				FITC-uPAcyclin, %
uPAcyclin					uPAcyclin						uPAcyclin		SD
None	7405	6506	9204		None	100 +/-3	100 +/-3	100+/-5			None	100	4
	7061	6194	8590								1fM	71	6
1fM	5423	4762	6377		1fM	75	75	71			1pM	59	4
	4347	4590	6693			60	72	75			1nM	57	2
1pM	4473	3556	5350		1pM	62	56	60			1µM	50	3
	4004	3930	5423			55	62	61
1nM	4110	3732	5004		1nM	56	59	56
	3906	3620	5338			54	57	60
1µM	3688	3494	4196		1µM	51	55	47
	3544	3120	4241			49	49	48
