# Supplementary material for: αV-Integrin-Dependent Inhibition of Glioblastoma Cell Migration, Invasion and Vasculogenic Mimicry by the uPAcyclin Decapeptide
Source: Cancers (Basel). 2023 Sep 28;15(19):4775. doi: 10.3390/cancers15194775 (PMC10571957; doi:10.3390/cancers15194775)
Supplement: Supplementary file 1 [file cancers-15-04775-s001.zip › U87-MG cell invasion 18_9 copia.xlsx]

## Sheet: data
INVASION ASSAYS
U87-MG cells
Expt. 1				Average expt 1
	cell number/field	% of basal			% basal	SD
DMEM 0,1% BSA	26	1		DMEM 0,1% BSA	100	1
DMEM 0,1% BSA	25	1		5% FBS	162	5
5% FBS	41	158		uPAcyclin 100 nM	110	2			Average 3 expts
5% FBS	43	165		uPAcyclin 1 µM	96	6				Invasion, %	SD
uPAcyclin 100 nM	29	111							DMEM 0.1% BSA	100	1
uPAcyclin 100 nM	28	108							5% FBS	162	11
uPAcyclin 1 µM	24	92							uPAcyclin 100nM	119	9
uPAcyclin 1 µM	26	100							uPAcyclin 1µM	96	6
									poly anti-𝛼v 5µg/ml	122	7
Expt.2				Average expt 2					Mab anti-𝛼v 5µg/ml	124	7
	cell number/field	% of basal			% basal	SD			poly anti-actina 1µg/ml	162	5
DMEM 0.1% BSA	24	1		DMEM 0.1% BSA	100	1
DMEM 0.1% BSA	23	1		5% FBS	150	6
5% FBS	37	154		uPAcyclin 100 nM	119	3
5% FBS	35	146		uPAcyclin 1 µM
uPAcyclin 100 nM	28	117		poly anti-𝛼v 5µg/ml	117	6
uPAcyclin 100 nM	29	121		Mab anti-𝛼v 5µg/ml	119	3
poly anti-𝛼v 5µg/ml	29	121		poly anti-actina 5µg/ml	131	3
poly anti-𝛼v 5µg/ml	27	113
Mab anti-𝛼v 5µg/ml	28	117
Mab anti-𝛼v 5µg/ml	29	121
poly anti-actina 5µg/ml	32	133
poly anti-actina 5µg/ml	31	129
Expt.3				Average expt 3
	cell number/field	% of basal			% basal	SD
DMEM 0.1% BSA	25	1		DMEM 0.1% BSA	100	1
DMEM 0.1% BSA	26	1		5% FBS	173	4
5% FBS	44	170		uPAcyclin 100 nM	129	3
5% FBS	46	176		uPAcyclin 1 µM
uPAcyclin 100 nM	34	131		poly anti-𝛼v 5µg/ml	127	5
uPAcyclin 100 nM	33	127		Mab anti-𝛼v 5µg/ml	129	2
poly anti-𝛼v 5µg/ml	32	123		poly anti-actina 5µg/ml	162	5
poly anti-𝛼v 5µg/ml	34	130
Mab anti-𝛼v 5µg/ml	34	130
Mab anti-𝛼v 5µg/ml	33	127
poly anti-actina 5µg/ml	41	158
poly anti-actina 5µg/ml	43	165
T-TEST
5% FBS	158
	165
	154
	146
	170
	176
uPAcyclin 100 nM	111	0.000241587	***
	108
	117
	121
	131
	127
uPAcyclin 10 µM	92	0.0048596	**
	100
poly anti-𝛼v 5µg/ml	121	0.00201654	**
	113
	123
	130
Mab anti-𝛼v 5µg/ml	117	0.00469696	**
	121
	130
	127
poly anti-actina 5µg/ml	133	0.00718809	*
	129
	158
	165
