# Supplementary material for: αV-Integrin-Dependent Inhibition of Glioblastoma Cell Migration, Invasion and Vasculogenic Mimicry by the uPAcyclin Decapeptide
Source: Cancers (Basel). 2023 Sep 28;15(19):4775. doi: 10.3390/cancers15194775 (PMC10571957; doi:10.3390/cancers15194775)
Supplement: Supplementary file 1 [file cancers-15-04775-s001.zip › U87-MG cell migration18_9 copia.xlsx]

## Sheet: data uPAcyclin
CHEMOTAXIS ASSAYS (MIGRATION)
U87 cells
Expt n°1				Average expt n°1
	cells n°/field	% of basal			%	SD
DMEM 0.1% BSA	18	1		DMEM 0.1% BSA	100	0
DMEM 0.1% BSA	16	1		5% FBS	189	16
5% FBS	34	2		uPAcyclin 10pM	147	25		Avarage 3 expts
5% FBS	30	1.77		uPAcyclin 1nM	112	8			%	SD
uPAcyclin 10pM	28	1.65		uPAcyclin 100nM	85	4		DMEM 0.1% BSA	100	1
uPAcyclin 10pM	22	1.29						5% FBS	182	17
uPAcyclin 1nM	18	1.06						uPAcyclin 10pM	168	23
uPAcyclin 1nM	20	1.18						uPAcyclin 1nM	119	22
uPAcyclin 100nM	14	0.82						uPAcyclin 100nM	87	12
uPAcyclin 100nM	15	0.88
Expt n°2				Average expt n°2
	cells n°/field	% of basal			%	SD
DMEM 0.1% BSA	12	1		DMEM 0.1% BSA	100	0
DMEM 0.1% BSA	15	1		5% FBS	186	21
5% FBS	28	2		uPAcyclin 10pM	186	10
5% FBS	24	1.71		uPAcyclin 1nM	168	16
uPAcyclin 10pM	27	1.93		uPAcyclin 100nM	125	25
uPAcyclin 10pM	25	1.79
uPAcyclin 1nM	25	1.79
uPAcyclin 1nM	22	1.57
uPAcyclin 100nM	20	1.43
uPAcyclin 100nM	15	1.07
Expt n°3				Average expt n°3
	cells n°/field	% of basal			%	SD
DMEM 0.1% BSA	16	1		DMEM 0.1% BSA	100	0
DMEM 0.1% BSA	15	1		5% FBS	163	0
5% FBS	26	1.63		uPAcyclin 10pM	132	9
5% FBS	26	1.63		uPAcyclin 1nM	107	9
uPAcyclin 10pM	20	1.25		uPAcyclin 100nM	78	4
uPAcyclin 10pM	22	1.38
uPAcyclin 1nM	16	1
uPAcyclin 1nM	18	1.13
uPAcyclin 100nM	13	0.81
uPAcyclin 100nM	12	0.75
T-TEST
5% FBS	200
	177
	200
	171
	163
	163
uPAcyclin 10pM	177	0.276598
	165
	171
	193
	163
	125
uPAcyclin 1nM	106	0.00866177	**
	118
	179
	157
	100
	113
uPAcyclin 100nM	82	0.000226334	***
	88
	143
	107
	81
	75

## Sheet: data antibodies
CHEMOTAXIS ASSAYS (MIGRATION)
U87 cells
Expt n°1				Average expt n°1
	cells n°/field	% of basal			%	SD
DMEM 0.1% BSA	16	1		DMEM 0.1% BSA	100	0
DMEM 0.1% BSA	14	1		5% FBS	180	0.1
5% FBS	28	1.87		Ab poly alpha-v 5µg/ml	120	0		Average 2 expts
5% FBS	26	1.73		Ab mono alpha-v 5µg/ml	129	5.65685			%	SD
Ab poly alpha-v 5µg/ml	18	1.2		Ab anti-GAPDH 1µg/ml	167	0		DMEM 0.1% BSA	100	0
Ab poly alpha-v 5µg/ml	18	1.2						5% FBS	181	5
Ab mono alpha-v 5µg/ml	16	1.25						Ab poly alpha-v 5µg/ml	122	4
Ab mono alpha-v 5µg/ml	20	1.33						Ab mono alpha-v 5µg/ml	121	10
Ab anti-GAPDH 1µg/ml	25	1.67						Ab anti-GAPDH 1µg/ml	165	7
Ab anti-GAPDH 1µg/ml	25	1.67
Expt n°2				Average expt n°2
	cells n°/field	% of basal			%	SD
DMEM 0.1% BSA	10	1		DMEM 0.1% BSA	100	0
DMEM 0.1% BSA	12	1		5% FBS	173	13
5% FBS	20	1.82		Ab poly alpha-v 5µg/ml	123	6.36396
5% FBS	18	1.64		Ab mono alpha-v 5µg/ml	114	6.36396
Ab poly alpha-v 5µg/ml	13	1.18		Ab anti-GAPDH 1µg/ml	160	6.36396
Ab poly alpha-v 5µg/ml	14	1.27
Ab mono alpha-v 5µg/ml	13	1.18
Ab mono alpha-v 5µg/ml	12	1.09
Ab anti-GAPDH 1µg/ml	17	1.55
Ab anti-GAPDH 1µg/ml	18	1.64
T-TEST
5% FBS	187
	173
	182
	164
Ab poly alpha-v 5µg/ml	120	0.00387607	**
	120
	118
	127
Ab mono alpha-v 5µg/ml	125	0.00200607	**
	133
	118
	108
Ab anti-GAPDH 1µg/ml	167	0.122581	no
	167
	155
	164

## Sheet: data scrambled
CHEMOTAXIS ASSAYS (MIGRATION)
U87 cells
Expt n°1				Average expt n°1
	cells n°/field	% of basal			%	SD
DMEM 0.1% BSA	11	105		DMEM 0.1% BSA	100	0.7
DMEM 0.1% BSA	10	95		5%FBS	167	0.7
5%FBS	18	171		uPA 10pM	139	0.7			Average 2 expts
5%FBS	17	162		uPA 1nM	124	0				%	SD
10pM uPAcyclin	14	133		scrambled 10pM	176	2.1			DMEM 0.1% BSA	100	0
10pM uPAcyclin	15	143		scrambled 1nM	186	0.7			5%FBS	174	9.89949
1nM uPAcyclin	13	124		scrabled 100 nM	158	0.7			uPAcyclin 10pM	143.5	6.36396
1nM uPAcyclin	13	124							uPAcyclin 1nM	131	9.89949
scrambled 10pM	20	191							scrambled 10pM	169	9.89949
scrambled 10pM	17	162							scrambled 1nM	183.5	3.53553
scrambled 1nM	20	191							scrambled 100nM	160	2.82843
scrambled 1nM	19	181
scrambled 100nM	16	153
scrambled 100nM	17	162
Expt n°2				Average expt n°2
	cells n°/field	% of basal			%	SD
	11	105		BSA	100	0.7
BSA	10	95		5%FBS	181	0.7
BSA	18	171		uPA 10pM	148	0.7
5%FBS	20	190		uPA 1nM	138	0
5%FBS	15	143		scrambled 10pM	162	1.4
10pM uPAcyclin	16	152		scrambled 1nM	181	1.4
10pM uPAcyclin	14	133		scrambled 100nM	162	2.82843
1nM uPAcyclin	15	143
1nM uPAcyclin	18	171
scrambled 10pM	16	152
scrambled 10pM	18	171
scrambled 1nM	20	190
scrambled 1nM	15	143
scrambled 100nM	19	181
scrambled 100nM
T-TEST
5% FBS	171
	190
	171
	162
uPAcyclin 10 pM	143	0.00670672	**
	152
	133
	143
uPAcyclin 1 nM	133	0.000497104	**
	143
	124
	124
S-uPAcyclin 10 pM	171	0.735114	no
	152
	191
	162
S-uPAcyclin 1nM	171	0.181899	no
	190
	191
	181
S-uPAcyclin 100nM	186	0.50657	no
	158
	158
	162

## Sheet: all data
CHEMOTAXIS ASSAYS (MIGRATION)
U87 cells
Average all expts
	% of the basal	SD
5% FBS	182	17
10pM uPAcyclin	168	23	*
1nM uPAcyclin	119	22	***
100nM uPAcyclin	87	12	***
10pM S-uPAcyclin	169	10	no
1nM S-uPAcyclin	183	3.5	no
100nM S-uPAcyclin	160	2.8	no
AB anti-av	122	4	**
MAb anti-av	121	10	***
AB anti-GAPDH	165	7	no
