# Supplementary material for: αV-Integrin-Dependent Inhibition of Glioblastoma Cell Migration, Invasion and Vasculogenic Mimicry by the uPAcyclin Decapeptide
Source: Cancers (Basel). 2023 Sep 28;15(19):4775. doi: 10.3390/cancers15194775 (PMC10571957; doi:10.3390/cancers15194775)
Supplement: Supplementary file 1 [file cancers-15-04775-s001.zip › U138-MG cell invasion 18_9 copia.xlsx]

## Sheet: data
INVASION ASSAYS
U138-MG cells
Expt. 1
	cell number/field	% of basal		Average expt 1	%	SD
DMEM 0,1%BSA	8	1		DMEM 0,1% BSA	100	0
DMEM 0,1%BSA	6	1		5% FBS	193	10
5% FBS	13	186		uPAcyclin 100nM	129	21
5% FBS	14	200		uPacyclin 1µM	93	10
uPAcyclin 100nM	10	143
uPAcyclin 100nM	8	114
uPacyclin 1µM	7	100						Average 2 expts
uPacyclin 1µM	6	86							%	SD
								BSA	100	3
								5% FBS	192	9
Expt. 2								uPAcyclin 100nM	135	16
								uPacyclin 1µM	92	9
	cell number/field
		% of basal		Average expt 2	%	SD
DMEM 0,1%BSA	6	1		DMEM 0,1%BSA	100	0
DMEM 0,1%BSA	6	1		5% FBS	192	12
5% FBS	11	183		uPAcyclin 100nM	142	12
5% FBS	12	200		uPacyclin 1µM	92	12
uPAcyclin 100nM	9	150
uPAcyclin 100nM	8	133
uPacyclin 1µM	6	100
uPacyclin 1µM	5	83
T-TEST
5% FBS	186
	200
	183
	200
uPAcyclin 100nM	143	0.0172861	*
	114
	150
	133
uPacyclin 1µM	100	0.00155726	***
	86
	100
	83
