# Supplementary material for: αV-Integrin-Dependent Inhibition of Glioblastoma Cell Migration, Invasion and Vasculogenic Mimicry by the uPAcyclin Decapeptide
Source: Cancers (Basel). 2023 Sep 28;15(19):4775. doi: 10.3390/cancers15194775 (PMC10571957; doi:10.3390/cancers15194775)
Supplement: Supplementary file 1 [file cancers-15-04775-s001.zip › U138-MG cell migration 18_9 copia.xlsx]

## Sheet: data
CHEMOTAXIS ASSAYS (MIGRATION)
U138 cells
Expt n°1				Average expt n°1
	cells n°/field	% of basal			%	SD
DMEM 0.1% BSA	8	1		DMEM 0.1% BSA	100	0
DMEM 0.1% BSA	6	1		5% FBS	179	11
5% FBS	13	186		uPAcyclin 1nM	107	10
5% FBS	12	171		uPAcyclin 100nM	86	21
uPAcyclin 1nM	8	114		Ab poly alpha-v 5µg/ml	100	20
uPAcyclin 1nM	7	100		Ab mono alpha-v 5µg/ml	71	1
uPAcyclin 100nM	7	100		Ab anti-GAPDH 1µg/ml	164	10			Average 2 expts.
uPAcyclin 100nM	5	71								%	SD
Ab poly alpha-v 5µg/ml	6	86							DMEM 0.1% BSA	100	0
Ab poly alpha-v 5µg/ml	8	114							5% FBS	168	15
Ab mono alpha-v 5µg/ml	5	71							uPAcyclin 1nM	110	12
Ab mono alpha-v 5µg/ml	5	71							uPAcyclin 100nM	84	13
Ab anti-GAPDH 1µg/ml	11	157							Ab poly alpha-v 5µg/ml	88	21
Ab anti-GAPDH 1µg/ml	12	171							Ab mono alpha-v 5µg/ml	64	10
									Ab anti-GAPDH 1µg/ml	157	10
Expt n°2				Average expt n°2
	cells n°/field	% of basal
DMEM 0.1% BSA	8	1			%	SD
DMEM 0.1% BSA	7	1		DMEM 0.1% BSA	100	0
5% FBS	13	163		5% FBS	157	9
5% FBS	12	150		uPAcyclin 1nM	113	18
uPAcyclin 1nM	8	100		uPAcyclin 100nM	82	9
uPAcyclin 1nM	10	125		Ab poly alpha-v 5µg/ml	76	18
uPAcyclin 100nM	6	75		Ab mono alpha-v 5µg/ml	57	9
uPAcyclin 100nM	7	88		Ab anti-GAPDH 1µg/ml	150	1
Ab poly alpha-v 5µg/ml	7	88
Ab poly alpha-v 5µg/ml	5	63
Ab mono alpha-v 5µg/ml	5	63
Ab mono alpha-v 5µg/ml	4	50
Ab anti-GAPDH 1µg/ml	12	150
Ab anti-GAPDH 1µg/ml	12	150
T-TEST
5% FBS	186
	171
	163
	150
uPAcyclin 1nM	114	0.0138018	*
	100
	100
	125
uPAcyclin 100nM	100	0.00181645	***
	71
	75
	88
Ab poly alpha-v 5µg/ml	86	0.00317049	**
	114
	88
	63
Ab mono alpha-v 5µg/ml	71	0.000103648	***
	71
	63
	50
Ab anti-GAPDH 1µg/ml	157	0.224706
	171
	150
	150
