# Supplementary material for: αV-Integrin-Dependent Inhibition of Glioblastoma Cell Migration, Invasion and Vasculogenic Mimicry by the uPAcyclin Decapeptide
Source: Cancers (Basel). 2023 Sep 28;15(19):4775. doi: 10.3390/cancers15194775 (PMC10571957; doi:10.3390/cancers15194775)
Supplement: Supplementary file 1 [file cancers-15-04775-s001.zip › U251-MG cell invasion 18_9 copia.xlsx]

## Sheet: data
INVASION ASSAYS
U251 cells
Expt. 1
				Average expt 1
	cell number/field	% of basal			%	SD
DMEM 0,1%BSA	8	1		DMEM 0,1% BSA	100	0
DMEM 0,1%BSA	9	1		5% FBS	206	8
5% FBS	19	211		uPAcyclin 100nM	156	1
5% FBS	18	200		uPacyclin 1µM	111	15
uPAcyclin 100nM	14	156						Average 2 expts
uPAcyclin 100nM	14	156
uPacyclin 1µM	11	122
uPacyclin 1µM	9	100							%	SD
								BSA	100	2
								5% FBS	198	12
Expt. 2								uPAcyclin 100nM	144	14
								uPacyclin 1µM	106	13
U251 110.000 cellule/campione				Average expts 2
	cell number/field	% of basal			%	SD
DMEM 0,1%BSA	11	1		DMEM 0,1%BSA	100	0
DMEM 0,1%BSA	10	1		5% FBS	191	13
5% FBS	20	181		uPAcyclin 100nM	132	6
5% FBS	22	200		uPacyclin 1µM	100	13
uPAcyclin 100nM	15	136
uPAcyclin 100nM	14	127
uPacyclin 1µM	12	109
uPacyclin 1µM	10	91
T-TEST
5% FBS	211
	200
	181
	200
uPAcyclin 100nM	156	0.00397996	**
	156
	136
	127
uPacyclin 1µM	122	0.00137051	**
	100
	109
	91
