# Supplementary material for: αV-Integrin-Dependent Inhibition of Glioblastoma Cell Migration, Invasion and Vasculogenic Mimicry by the uPAcyclin Decapeptide
Source: Cancers (Basel). 2023 Sep 28;15(19):4775. doi: 10.3390/cancers15194775 (PMC10571957; doi:10.3390/cancers15194775)
Supplement: Supplementary file 1 [file cancers-15-04775-s001.zip › U251-MG cell migration 18_9 copia.xlsx]

## Sheet: data uPAcyclin + antibodies
CHEMOTAXIS ASSAYS (MIGRATION)
U251 cells
Expt n.1				Average expt n.1
	cells n°/field	% of basal			%	SD
DMEM 0.1% BSA	9	1		DMEM 0.1% BSA	100	0
DMEM 0.1% BSA	7	1		5% FBS	157	9
5% FBS	13	163		uPAcyclin 1nM	113	1		Average 2 expts
5% FBS	12	150		uPAcyclin 100nM	76	18			%	SD
uPAcyclin 1nM	9	113		Ab poly alpha-v 5µg/ml	94	8		DMEM 0.1% BSA	100	0
uPAcyclin 1nM	9	113		Ab mono alpha-v 5µg/ml	69	8		5% FBS	156	11
uPAcyclin 100nM	7	88		Ab anti-GAPDH 1µg/ml	132	26		uPAcyclin 1nM	98	18
uPAcyclin 100nM	5	63						uPAcyclin 100nM	66	18
Ab poly alpha-v 5µg/ml	8	100						Ab poly alpha-v 5µg/ml	105	15
Ab poly alpha-v 5µg/ml	7	88						Ab mono alpha-v 5µg/ml	71	7
Ab mono alpha-v 5µg/ml	6	75						Ab anti-GAPDH 1µg/ml	150	6
Ab mono alpha-v 5µg/ml	5	63
Ab anti-GAPDH 1µg/ml	9	113
Ab anti-GAPDH 1µg/ml	12	150
Expt n.2				Average expt n.2
	cells n°/field	% of basal			%	SD
DMEM 0.1% BSA	10	1		DMEM 0.1% BSA	100	0
DMEM 0.1% BSA	8	1		5% FBS	156	16
5% FBS	15	167		uPAcyclin 1nM	84	8
5% FBS	13	144		uPAcyclin 100nM	56	16
uPAcyclin 1nM	8	89		Ab poly alpha-v 5µg/ml	117	8
uPAcyclin 1nM	7	78		Ab mono alpha-v 5µg/ml	73	8
uPAcyclin 100nM	6	67		Ab anti-GAPDH 1µg/ml	150	8
uPAcyclin 100nM	4	44
Ab poly alpha-v 5µg/ml	11	122
Ab poly alpha-v 5µg/ml	10	111
Ab mono alpha-v 5µg/ml	7	78
Ab mono alpha-v 5µg/ml	6	67
Ab anti-GAPDH 1µg/ml	13	144
Ab anti-GAPDH 1µg/ml	14	156
T-TEST
5% FBS	163
	150
	167
	144
uPAcyclin 1nM	113	0.00763401	*
	113
	89
	78
uPAcyclin 100nM	88	0.000634804	***
	63
	67
	44
Ab poly alpha-v 5µg/ml	100	0.00590494	**
	88
	122
	111
Ab mono alpha-v 5µg/ml	75	7.6195e-05	***
	63
	78
	67
Ab anti-GAPDH 1µg/ml	113	0.345944	0.755193
	150
	144
	156

## Sheet: data uPAcyclin
CHEMOTAXIS ASSAYS (MIGRATION)
U251 cells
Expt n°1				Average expt n°1
	cells n°/field	% of basal			%	SD
DMEM 0.1% BSA	11	1		DMEM 0.1% BSA	100	1
DMEM 0.1% BSA	8	1		5% FBS	165	7
5% FBS	17	1.7		uPAcyclin 1nM	105	7			Average 2 expts
5% FBS	16	1.6		uPAcyclin 100nM	80	0				%	SD
uPAcyclin 1nM	10	1							DMEM 0.1% BSA	100	0
uPAcyclin 1nM	11	1.1							5% FBS	165	0
uPAcyclin 100nM	8	0.8							uPAcyclin 1nM	108	3.5
uPAcyclin 100nM	8	0.8							uPAcyclin 100nM	85	7
Expt n°2				Average expt n°2
	cells n°/field	% of basal			%	SD
DMEM 0.1% BSA	10	1		DMEM 0.1% BSA	100	1
DMEM 0.1% BSA	9	1		5% FBS	165	7
5% FBS	16	1.6		uPAcyclin 1nM	110	7
5% FBS	17	1.7		uPAcyclin 100nM	90	0
uPAcyclin 1nM	11	1.1
uPAcyclin 1nM	11	1.1
uPAcyclin 100nM	10	1
uPAcyclin 100nM	8	0.8
T-TEST
5% FBS	170
	160
	160
	170
uPAcyclin 1nM	100	0.00261872	**
	110
	110
	95
uPAcyclin 100nM	80	0.00148107	**
	80
	100
	80

## Sheet: data scrambled
CHEMOTAXIS ASSAYS (MIGRATION)
U251 cells
Expt n°1				Average expt n°1
	cells n°/field	% of basal			%	SD
DMEM 0.1% BSA	14	1		5% FBS	171	9.89949
5% FBS	25	1.78		uPAcyclin 100nM	89.5	4.94975		Average 2 expts
5% FBS	23	1.64		S-uPAcyclin 1nM	193	9.89949			%	SD
uPAcyclin 100nM	12	0.86		S-uPAcyclin 100nM	153.5	14.8492		DMEM 0.1% BSA	100	0
uPAcyclin 100nM	13	0.93						5% FBS	173	2.82843
S-uPAcyclin 1nM	28	2						uPAcyclin 100nM	99.2955	13.8529
S-uPAcyclin 1nM	26	1.86						S-uPAcyclin 1nM	176.045	23.9773
S-uPAcyclin 100nM	23	1.64						S-uPAcyclin 100nM	157.432	5.56043
S-uPAcyclin 100nM	20	1.43
Expt n°2				Average expt n°2
	cells n°/field	% of basal			%	SD
DMEM 0.1% BSA	22	1		DMEM 0.1% BSA	100	0
DMEM 0.1% BSA	18	1		5% FBS	175	9.64237
5% FBS	40	1.82		uPAcyclin 100nM	109.091	19.2847
5% FBS	37	1.68		S-uPAcyclin 1nM	159.091	19.2847
uPAcyclin 100nM	27	1.23		S-uPAcyclin 100nM	161.364	3.21412
uPAcyclin 100nM	21	0.95
S-uPAcyclin 1nM	32	1.45
S-uPAcyclin 1nM	38	1.72
S-uPAcyclin 100nM	35	1.59
S-uPAcyclin 100nM	36	1.63
T-TEST
5% FBS	178
	164
	182
	168
uPAcyclin 100nM	86	0.0015522	**
	93
	122
	95
s-uPAcyclin 1nM	200	0.855945	no
	186
	145
	172
s-uPAcyclin 100nM	164	0.0364568	*
	143
	159
	164

## Sheet: all data
CHEMOTAXIS ASSAYS (MIGRATION)
U251 cells
Average all expts
	% of the basal	SD
5% FBS	165	16
uPAcyclin 1nM	99	8	*
uPAcyclin 100nM	83	16	***
S-uPAcyclin 1nM	176	22	no
S-uPAcyclin 100nM	157	13	no
Ab poly alpha-v 5µg/ml	117	8	**
Ab mono alpha-v 5µg/ml	73	8	***
Ab anti-GAPDH 1µg/ml	150	8	no
